# Supplementary material
Source: PubMed Central journal article supplement (PMC2800077)
Supplement: NIHMS165537-supplement-supplemental_figure_S1.pdf [file NIHMS165537-supplement-supplemental_figure_S1.pdf]

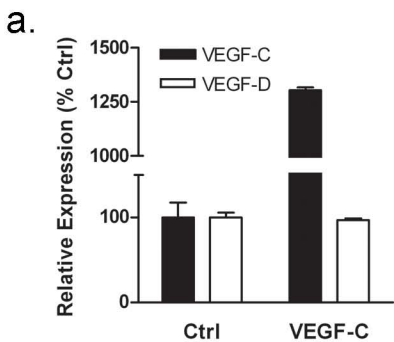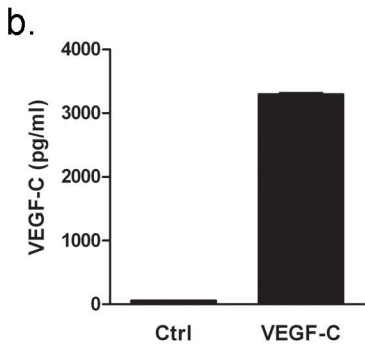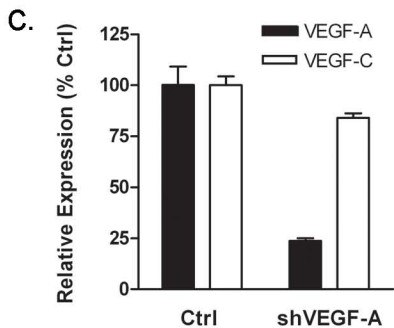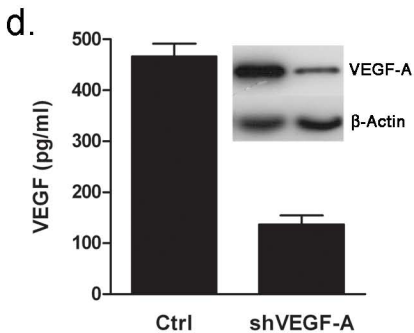

## Supplemental Figure S1

Transduction of CWR22Rv-1 cells with lentivirus expressing VEGF-C resulted in high-level expression as measured by real time RT-PCR, *A*, and ELISA, *B*. *C*, VEGF-A expression was reduced by 75% in VEGF-A shRNA-expressing cells compared to control. Control and shVEGF-A expressing cells remain unaffected in expression of VEGF-C. *D*, Supernatants from the same cells show reduced secretion of VEGF-A by ELISA.
